# Supplementary material for: Anti-inflammatory microRNA-146a protects mice from diet-induced metabolic disease
Source: PubMed Central journal article supplement (PMC6395003; doi:10.1371/journal.pgen.1007970), 2019-02-15
Supplement: pgen.1007970.s006.pdf [file pgen.1007970.s006.pdf]

**S1 Table: Materials Table**

| REAGENT or RESOURCE                              | SOURCE          | IDENTIFIER                           |
|--------------------------------------------------|-----------------|--------------------------------------|
| Antibodies                                       |                 |                                      |
| phosphorylated IKB $\alpha$                      | Cell Signaling  | Cat#9246S; RRID:                     |
| IKB $\alpha$                                     | Cell Signaling  | Cat#9242S; RRID:                     |
| Traf6                                            | Abcam           | Cat#ab33915;<br>RRID: AB_778572      |
| beta actin                                       | Abcam           | Cat#ab8226;<br>RRID:AB_306371        |
| GAPDH                                            | Santa Cruz      | Cat#sc-25778<br>RRID:AB_1016766<br>8 |
| PerCP/Cy5.5 anti-mouse CD45 Antibody             | BioLegend       | Cat#103131<br>RRID:AB_893344         |
| APC CD11b                                        | BioLegend       | Cat#101212<br>RRID:AB_312795         |
| PE anti-mouse F4/80 [BM8] Antibody               | BioLegend       | Cat#123110<br>RRID:AB_893486         |
| Chemicals, Peptides, and Recombinant Proteins    |                 |                                      |
| Glucose                                          | Sigma           | G8270                                |
| Recombinant Mouse M-CSF (carrier-free)           | Biolegend       | Cat#576404                           |
| GoTaq Master Mix                                 | Promega         | Cat#A6002                            |
| Lipopolysaccharides from Escherichia coli 026:B6 | Sigma Chemical  | Cat#L5543-2ML                        |
| Rapamycin                                        | LC Laboratories | Cat#R-5000                           |
| CD40-Traf6 Signaling Inhibitor                   | Millipore Sigma | Cat#5.30352.0001                     |
| Captisol                                         | Ligand          | Cat#RC-0C7-100                       |
| PEG400                                           | Sigma-Aldrich   | Cat#202398-250G                      |
| Critical Commercial Assays                       |                 |                                      |

|                                                                                        |                         |                                                                                                                                                                                                         |
|----------------------------------------------------------------------------------------|-------------------------|---------------------------------------------------------------------------------------------------------------------------------------------------------------------------------------------------------|
| Seahorse XF-96 Mito Stress Test                                                        | Agilent                 | <a href="https://www.agilent.com/en/products/cell-analysis/seahorse-analyzers/seahorse-xfe96-analyzer">https://www.agilent.com/en/products/cell-analysis/seahorse-analyzers/seahorse-xfe96-analyzer</a> |
| Ultra Sensitive Mouse Insulin ELISA                                                    | Crystal Chem            | Cat#90080                                                                                                                                                                                               |
| miRNeasy Mini Kit                                                                      | Qiagen                  | Cat#217004                                                                                                                                                                                              |
| qScript Flex cDNA Synthesis Kit                                                        | Quanta Biosciences, VWR | Cat#101414-110                                                                                                                                                                                          |
| MAGPIX mouse metabolic hormone panel                                                   | Merck Millipore         | Cat#MMHMAG-44K                                                                                                                                                                                          |
| Deposited Data                                                                         |                         |                                                                                                                                                                                                         |
| RNA-Sequencing Data in ATMs                                                            | NCBI GEO Repository     | Refer to materials and methods in paper                                                                                                                                                                 |
| Experimental Models: Cell Lines                                                        |                         |                                                                                                                                                                                                         |
| RAW 264.7 Cell line                                                                    | ATCC                    |                                                                                                                                                                                                         |
| Experimental Models: Organisms/Strains                                                 |                         |                                                                                                                                                                                                         |
| <i>M. musculus</i> : Strain C57BL/6 miR-146a-/-                                        | This Paper              | N/A                                                                                                                                                                                                     |
| <i>M. musculus</i> : Strain C57BL/6 WT                                                 | This Paper              | N/A                                                                                                                                                                                                     |
| <i>M. musculus</i> : Strain C57BL/6 miR-146a-/-                                        | The Jackson Laboratory  | Stock no.: 016239                                                                                                                                                                                       |
| <i>M. musculus</i> : Strain C57BL/6 WT                                                 | The Jackson Laboratory  | Stock no.: 000664                                                                                                                                                                                       |
| Oligonucleotides                                                                       |                         |                                                                                                                                                                                                         |
| Traf6 Crispr guide #1:<br>GGAGATCCAGGGCTACGATG                                         | This paper              | N/A                                                                                                                                                                                                     |
| Traf6 Crispr guide #2:<br>GATGGAAGTGGACATCTCG                                          | This paper              | N/A                                                                                                                                                                                                     |
| hsa-miR-146a-5p LNA miRNA PCR Assay<br>(Primer set, UniRT)                             | Qiagen                  | Cat#339306                                                                                                                                                                                              |
| <i>Cxcl10</i><br>F: GAAATCATCCCTGCGAGCCTATCC<br>R: GCAATTAGGACTAGCCATCCACTGGG          | IDT                     | N/A                                                                                                                                                                                                     |
| <i>Tnfa</i><br>F: CCCTCACACTCAGATCATCTTCT<br>R: GCTACGACGTGGGCTACAG                    | IDT                     | N/A                                                                                                                                                                                                     |
| MHCII ( <i>H2-Ab1</i> exon 1/2)<br>F: CTGCCATTACCTGTGCCTTAG<br>R: GTAGCACTCGCCCATGAACT | IDT                     | N/A                                                                                                                                                                                                     |
| F4/80 ( <i>Adgre1</i> )<br>F: TGGGAAAGACTGGATTCTGGG<br>R: GGAGCCATTCAAGACAAAGCC        | IDT                     | N/A                                                                                                                                                                                                     |

|                                                                                     |     |     |
|-------------------------------------------------------------------------------------|-----|-----|
| CD11b ( <i>Itgam</i> )<br>F: CCTTCATCAACAACAACCAGAGTGG<br>R: CGAGGTGCTCCTAAAACCAAGC | IDT | N/A |
| <i>Cd36</i><br>F: TCCTCTGACATTTGCAGGTCTATC<br>R: AAAGGCATTGGCTGGAAGAA               | IDT | N/A |
| <i>Fabp4</i><br>F: AAGAAGTGGGAGTGGGGCTTTG<br>R: CTGTCGTCTGCGGTGATTC                 | IDT | N/A |
| <i>Il12p40</i><br>F: AGATGACATCACCTGGACCT<br>R: GCCATGAGCACGTGAACCGT                | IDT | N/A |
| <i>Ccl2</i><br>F: TAAAAACCTGGATCGGAACCAAA<br>R: GCATTAGCTTCAGATTTACGGGT             | IDT | N/A |
| <i>Traf6</i><br>F: AAGCCTGCATCATCAAATCC<br>R: CTGGCACTTCTGGAAAGGAC                  | IDT | N/A |
| <i>Nos2</i><br>F: CAGCTGGGCTGTACAAACCTT<br>R: CATTGGAAGTGAAGCGGTTCCG                | IDT | N/A |
| <i>IL-6</i><br>F: TAGTCCTTCTACCCCAATTTCC<br>R: TTGGTCCTTAGCCACTCCTTC                | IDT | N/A |
| <i>CD45 (PTPRC)</i><br>F: GGGTCCACCTACATAAATGCCAG<br>R: GTTCTGTTCCTTCTTCACATCG      | IDT | N/A |
| <i>Leptin</i><br>F: GAGACCCCTGTGTCGGTTC<br>R: CTGCGTGTGTGAAATGTCATTG                | IDT | N/A |
| <i>Ucp1</i><br>F: CGTACCAAGCTGTGCGATGT<br>R: GAGTCGCAGAAAAGAAGCCAC                  | IDT | N/A |
| <i>Dio2</i><br>F: CTGCGCTGTGTCTGGAAC<br>R: GGAGCATCTTCACCCAGTTT                     | IDT | N/A |
| <i>Elov13</i><br>F: TCCGCGTTCTCATGTAGGTCT<br>R: GGACCTGATGCAACCCTATGA               | IDT | N/A |
| <i>Cidea</i><br>F: ATCACAACCTGGCCTGGTTACG<br>R: TACTACCCGGTGTCCATTTCT               | IDT | N/A |

|                                                                        |                                                           |                                                                                   |
|------------------------------------------------------------------------|-----------------------------------------------------------|-----------------------------------------------------------------------------------|
| <i>Pgc1a</i><br>F: CCCTGCCATTGTTAAGACC<br>R: TGCTGCTGTTCCCTGTTTTC      | IDT                                                       | N/A                                                                               |
| <i>Prdm16</i><br>F: CAGCACGGTGAAGCCATTC<br>R: GCGTGCATCCGCTTGTG        | IDT                                                       | N/A                                                                               |
| <i>Acc1</i><br>F: TGTACAAGCAGTGTGGGCTGGCT<br>R: CCACATGGCCTGGCTTGGAGGG | IDT                                                       | N/A                                                                               |
| <i>Chrebp</i><br>F: GGCCTGGCTGGAACAGTA<br>R: CGAAGGGAATTCAGGACAGT      | IDT                                                       | N/A                                                                               |
| <i>Srebp1c</i><br>F: GGCCCGGGAAGTCACTGT<br>R: GGAGCCATGGATTGCACATT     | IDT                                                       | N/A                                                                               |
| <b>Software and Algorithms</b>                                         |                                                           |                                                                                   |
| Prism 7                                                                | GraphPad Software                                         | <a href="https://www.graphpad.com/company/">https://www.graphpad.com/company/</a> |
| Illumina HiSeq 50 cycle single-read sequencing version 4               | University of Utah High Throughput Genomics Core Facility | N/A                                                                               |
| <b>Other</b>                                                           |                                                           |                                                                                   |
| 10% kcal control mouse feed                                            | Research Diets                                            | D12450Bi                                                                          |
| 45% kcal diet, irradiated                                              | Research Diets                                            | D12451i                                                                           |
